# Supplementary material for: Taxonomic and Functional Distribution of Bacterial Communities in Domestic and Hospital Wastewater System: Implications for Public and Environmental Health
Source: MDPI journal article supplement (doi:10.3390/antibiotics10091059), 2021-09-01

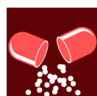

## Supplementary Information

**Figure S1:** Observed chromatograms for hospital and domestic wastewater samples

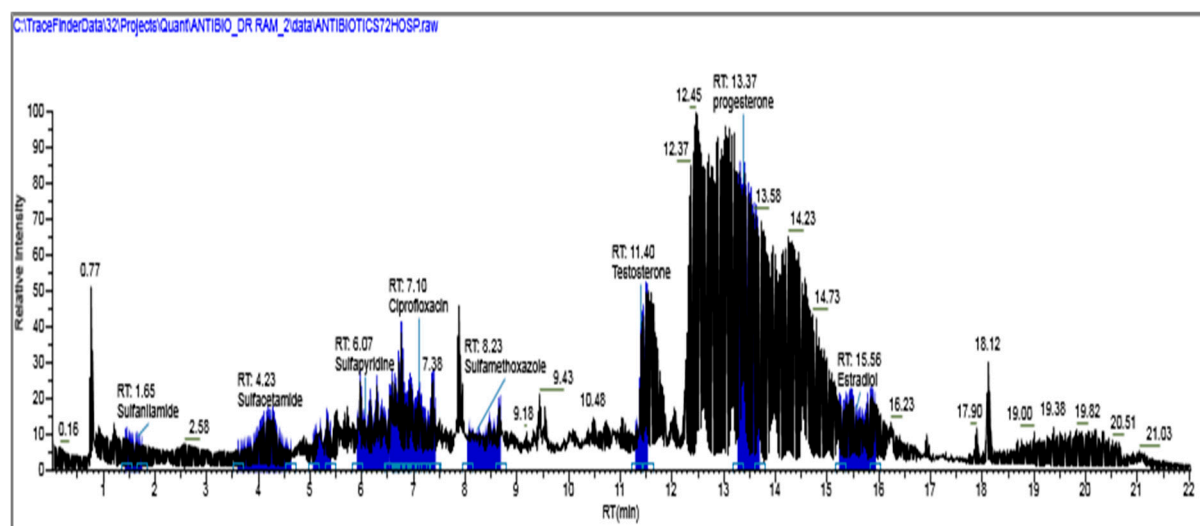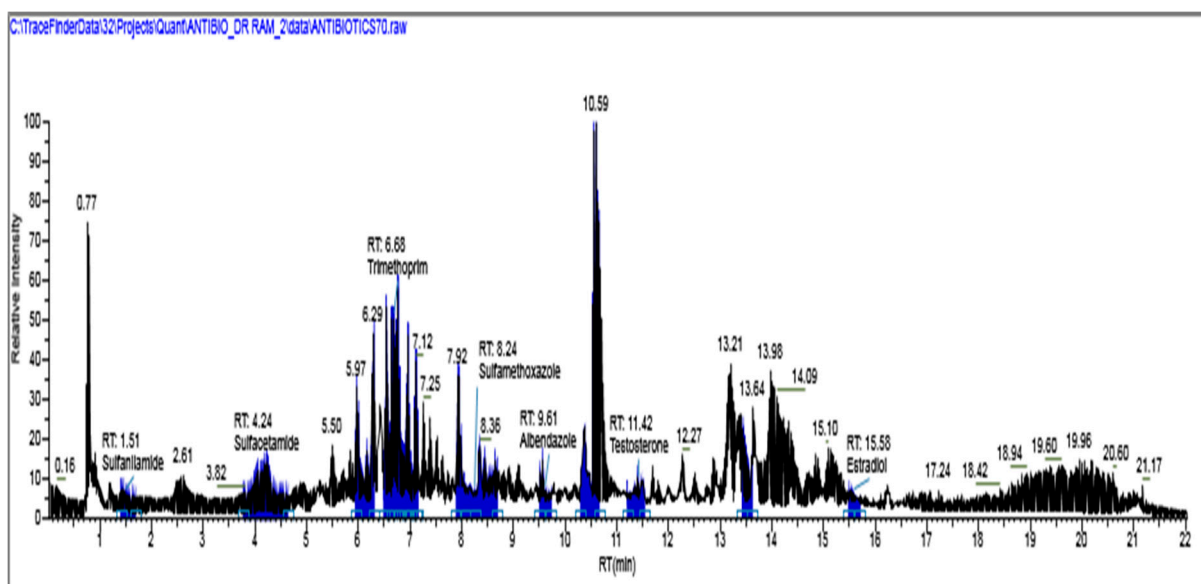

**Table S1: Summary of occurrence and concentration of antibiotics in collected wastewater samples**

| S/N | Antibiotics      | Mean concentration (ng/L) HWW | Mean concentration (ng/L) DWW | t-stat | p-value |
|-----|------------------|-------------------------------|-------------------------------|--------|---------|
| 1   | Albendazole      | 23.85                         | 0                             | 542.09 | 0.000*  |
| 2   | Azithromycin     | 19.66                         | 3.21                          | 10.06  | 0.009*  |
| 3   | Ciprofloxacin    | 34.57                         | 17.66                         | 6.013  | 0.027*  |
| 4   | Clarithromycin   | 13.81                         | 5.64                          | 12.88  | 0.002*  |
| 5   | Enrofloxacin     | 4.23                          | 4.58                          | -0.54  | 0.643   |
| 6   | Levofloxacin     | 48.27                         | 1.47                          | 46.09  | 0.000*  |
| 7   | Norfloxacin      | 0.28                          | 2.18                          | -10.29 | 0.009*  |
| 8   | Ofloxacin        | 32.13                         | 16.97                         | 0.52   | 0.655   |
| 9   | Oxytetracycline  | 26.13                         | 27.63                         | -1.34  | 0.309   |
| 10  | Sulfacetamide    | 60.34                         | 85.10                         | -7.61  | 0.017*  |
| 11  | Sulfadiazine     | 1.05                          | 0                             | 2.05   | 0.176   |
| 12  | Sulfamerazine    | 4.62                          | 0                             | 19.29  | 0.003*  |
| 13  | Sulfamethoxazole | 96.23                         | 72.87                         | 114.91 | 0.000*  |
| 14  | Sulfamoxol       | 3.06                          | 0                             | 32.09  | 0.001*  |
| 15  | Sulfanilamide    | 30.28                         | 5.74                          | 44.97  | 0.000*  |
| 16  | Sulfapyridine    | 38.66                         | 0.88                          | 33.67  | 0.001*  |
| 17  | Trimethoprim     | 13.22                         | 25.93                         | -14.66 | 0.005*  |

\* Welch T-test for abundance of antibiotics was used.  $P < 0.5$  shows significance

**Figure S2:** Firmicutes to Bacteroidetes (F/B) ratio of domestic and hospital effluent samples.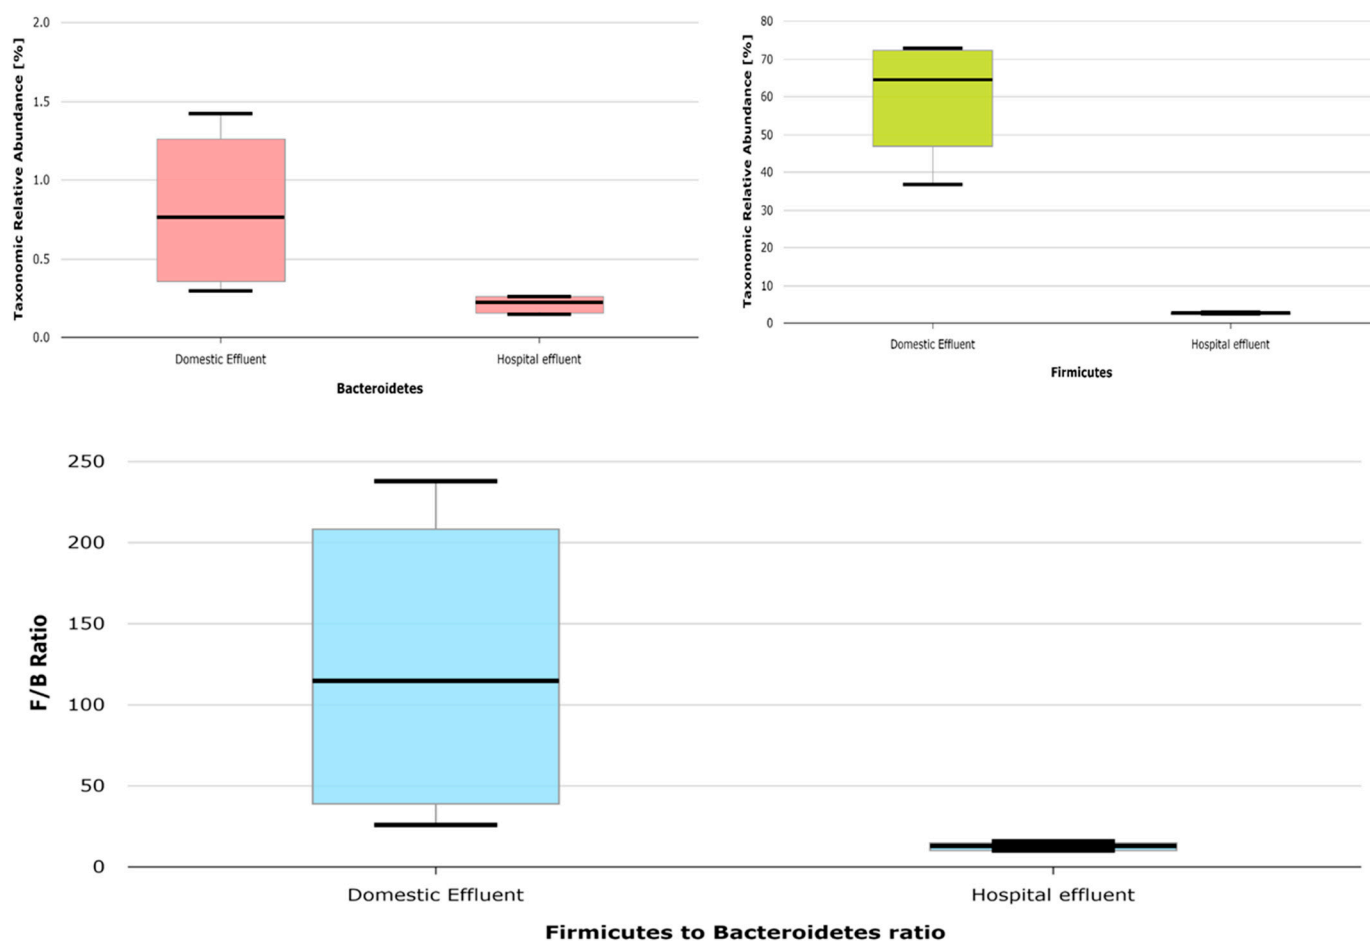

Supplement: s1 [file s1]
